# Supplementary material for: A survey of autoencoder-based recommender systems
Source: Springer Nature journal article supplement (doi:10.1007/s11704-018-8052-6), 2019-08-30
Supplement: 11704_2018_8052_MOESM1_ESM.pdf [file 11704_2018_8052_MOESM1_ESM.pdf]

# A survey of autoencoder-based recommender systems

**Guijuan ZHANG , Yang LIU, Xiaoning JIN**

Frontiers of Computer Science, DOI: [10.1007/s11704-018-8052-6](https://doi.org/10.1007/s11704-018-8052-6)

# Problems & Ideas

- **Problems:** At present, deep learning has been widely used in recommender systems. As an effective deep learning method, autoencoder is widely used in recommender systems. However, there is no review on the autoencoder-based recommender systems (RSs).
- **ideas:** As a review article, this paper classifies and summarizes the currently works on autoencoder-based recommender systems. Figure 1 shows our classification framework for autoencoder-based recommender systems.

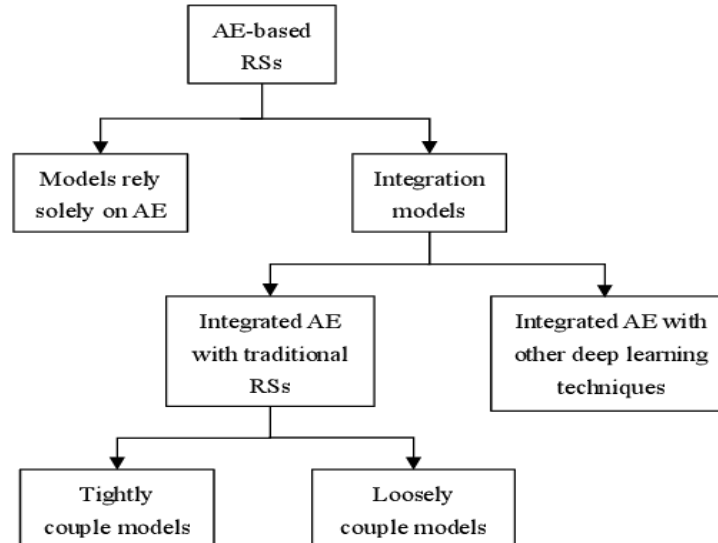

Figure 1: The classification framework of autoencoder-based recommender systems

# Main Contributions

In this paper, we conduct a systematic review on AE-based recommender systems. Particularly, we propose a classification scheme to classify current related works and highlight the main prototypes of AE-based RSs as well as summarize the advantages and disadvantages of each. At last, we discuss future research directions in AE-based recommender systems. Figure 2 shows the classification of shortlisted publications according to the proposed classification framework.

| Models rely solely on AE                                                                         | Integration models                                                                        |                                                                           |                                                  |
|--------------------------------------------------------------------------------------------------|-------------------------------------------------------------------------------------------|---------------------------------------------------------------------------|--------------------------------------------------|
|                                                                                                  | Integrate AE with traditional Rss<br><i>Tightly coupled models</i>                        | <i>Loosely coupled models</i>                                             | Integrate AE with other deep learning techniques |
| [47], [50], [53], [54],<br>[56], [58], [59], [61],<br>[62], [119], [120], [121],<br>[122], [123] | [83], [84], [85], [88],<br>[91], [92], [93], [94],<br>[98], [124], [125], [126],<br>[127] | [99], [104], [105], [108],<br>[128], [129], [130], [131],<br>[132], [133] | [110], [112], [115], [117],<br>[118]             |

Figure 2: Classification of shortlisted publications
